# Supplementary material for: XeF 2 gas assisted focused electron beam induced etching of niobium thin films: towards direct write editing of niobium superconducting devices
Source: Royal Society of Chemistry journal article supplement (doi:10.1039/d4nh00407h), 2024-11-05
Supplement: d4nh00407h1.pdf [file d4nh00407h1.pdf]

Supplementary Information

**XeF<sub>2</sub> Gas Assisted Focused Electron Beam Induced Etching of Niobium Thin Films: Towards  
Direct Write Editing of Niobium Superconducting Devices**

Spencer Gellerup<sup>1</sup>, Reece Emery<sup>1</sup>, Scott T. Retterer<sup>2</sup>, Steven Randolph<sup>2\*</sup>, Philip Rack<sup>1\*\*</sup>

<sup>1</sup>Department of Material Science and Engineering, University of Tennessee – Knoxville,

Knoxville, TN 37996, USA

<sup>2</sup>Center for Nanophase Materials Science, Oak Ridge National Laboratory, Oak Ridge, TN 37830,

USA

\*randolphsj@ornl.gov

\*\*prack@utk.edu

*SI Section 1. XeF<sub>2</sub> gas-assisted FEBIE box etches of Nb films*

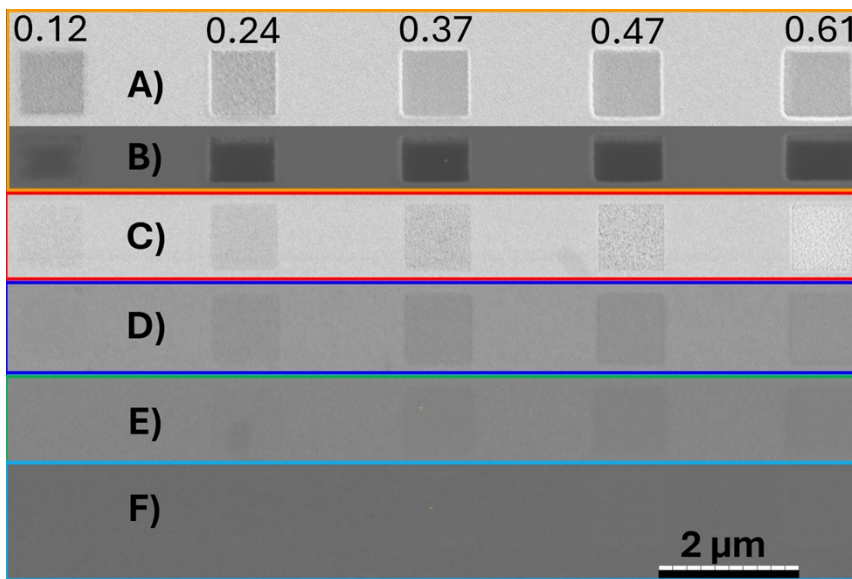

Figure S1. SEM images of 1 μm<sup>2</sup> gas-assisted FEBIE box etches at a beam energy of 1 keV, dwell time of 1 μs, pixel pitch of 10 nm, XeF<sub>2</sub> working pressure of 1x10<sup>-5</sup> Torr for beam currents of, a) 0.025 nA with tilted photo at b) 52°, c) 0.1 nA, d), 0.2 nA, e) 0.4 nA, and f) 0.8 nA.

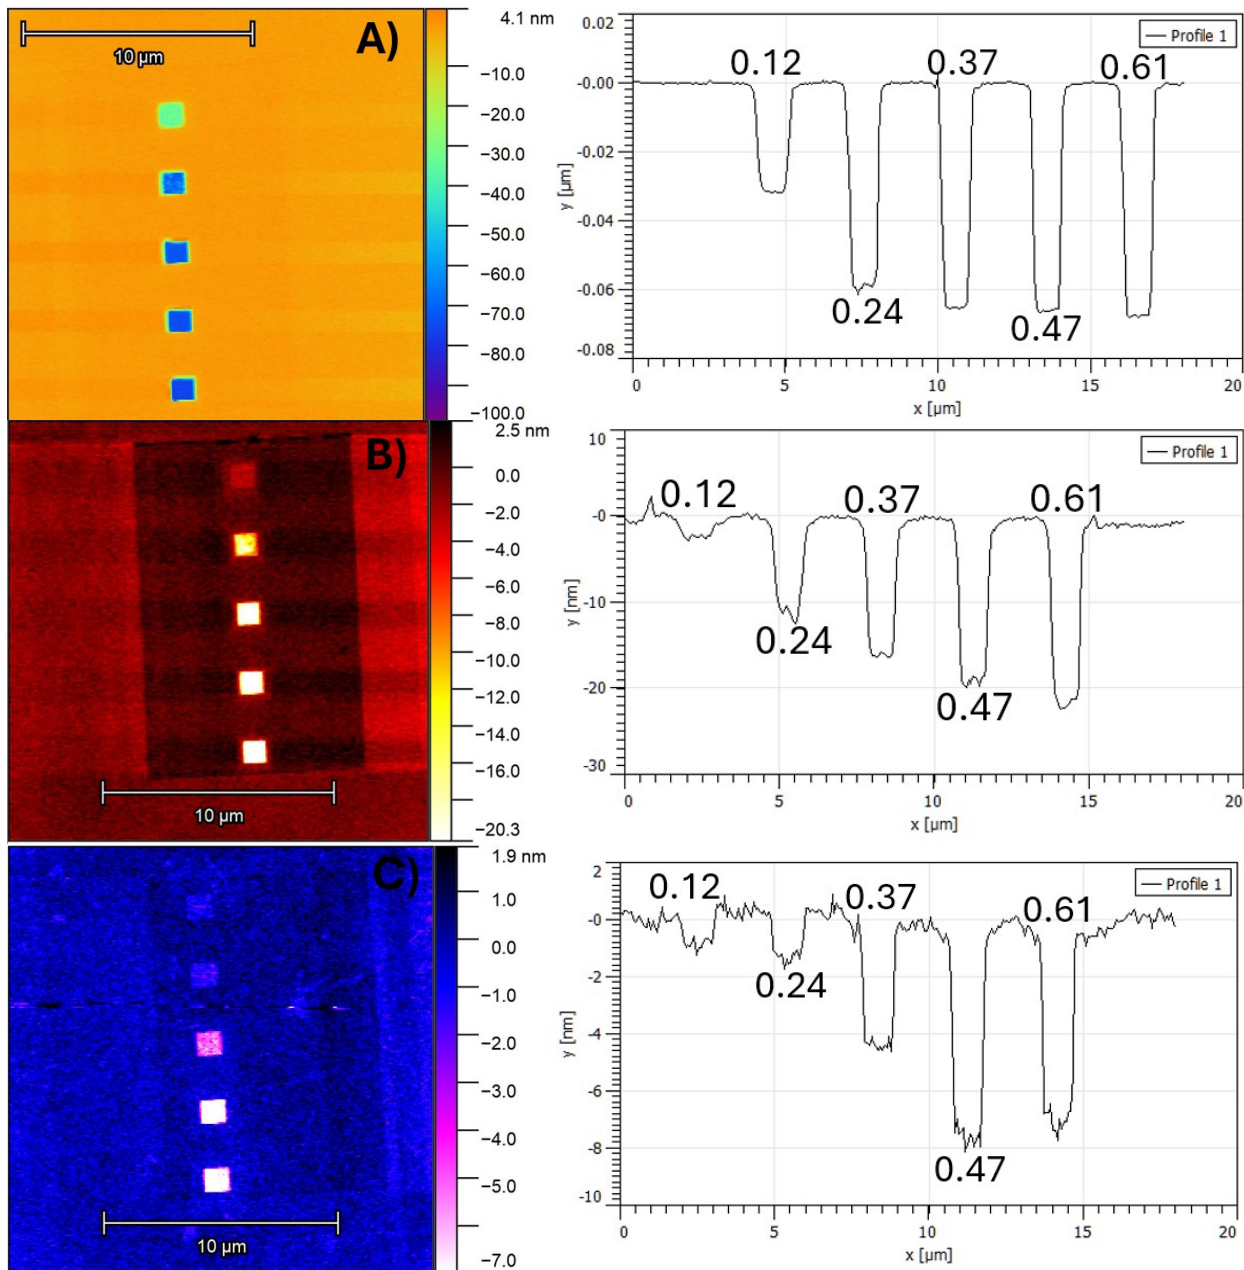

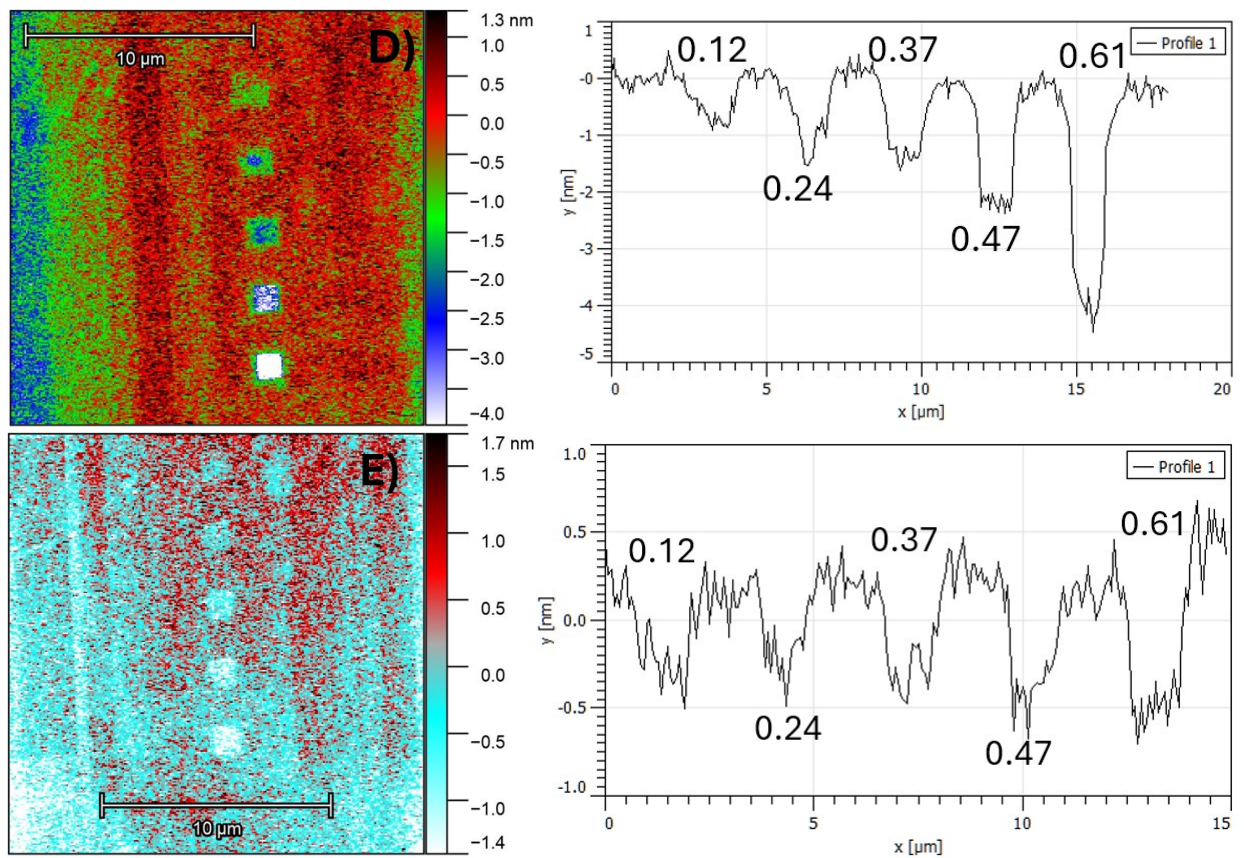

Figure S2. AFM images and profile graphs of  $1 \mu\text{m}^2$  gas-assisted FEBIE box etches at a beam energy of 1 keV, dwell time of  $1 \mu\text{s}$ , pixel pitch of 10 nm,  $\text{XeF}_2$  working pressure of  $1 \times 10^{-5}$  Torr for beam currents of, a) 0.025 nA, b) 0.1 nA, c) 0.2 nA, d) 0.4 nA, and e) 0.8 nA for doses of 0.12, 0.24, 0.37, 0.47, and 0.61  $\text{nC}/\mu\text{m}^2$ .

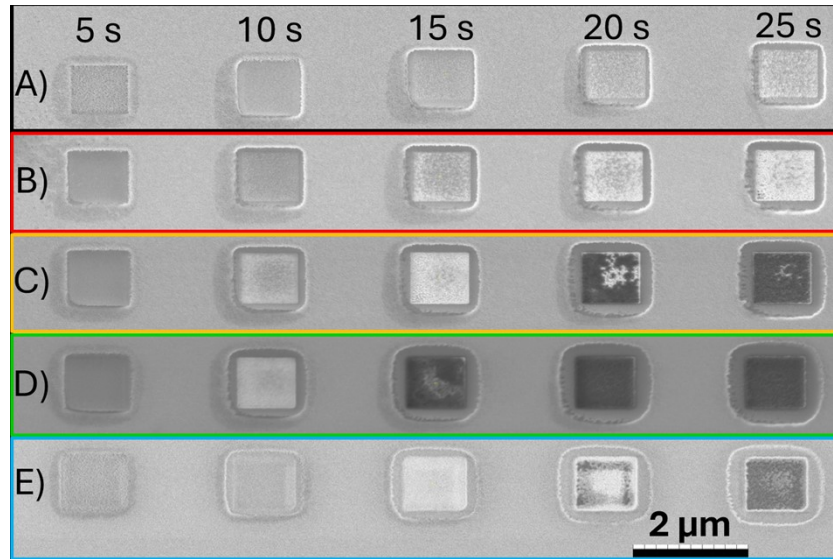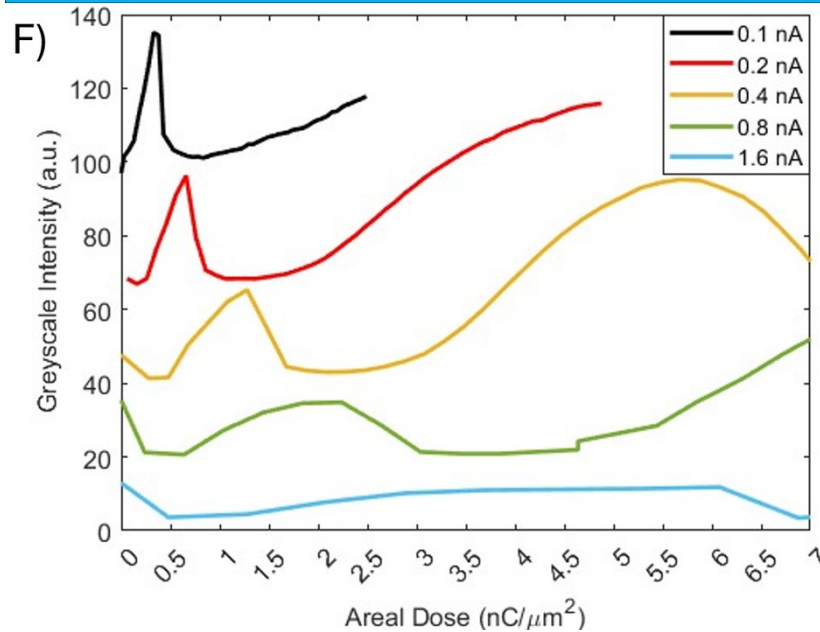

Figure S3. Gas-assisted FEBIE of 1 μm<sup>2</sup> box etches were conducted at a beam energy of 1 keV, dwell time of 1 μs, pixel pitch of 10 nm, XeF<sub>2</sub> working pressure of 3x10<sup>-5</sup> Torr. SEM images were taken for boxes etched at beam currents of a) 0.1 nA, b) 0.2 nA, c) 0.4 nA, d) 0.8 nA, and e) 1.6 nA. EPM graphs of these etches were all plotted in f) and every EPM for the 0.2 nA series are plotted over one another in g).



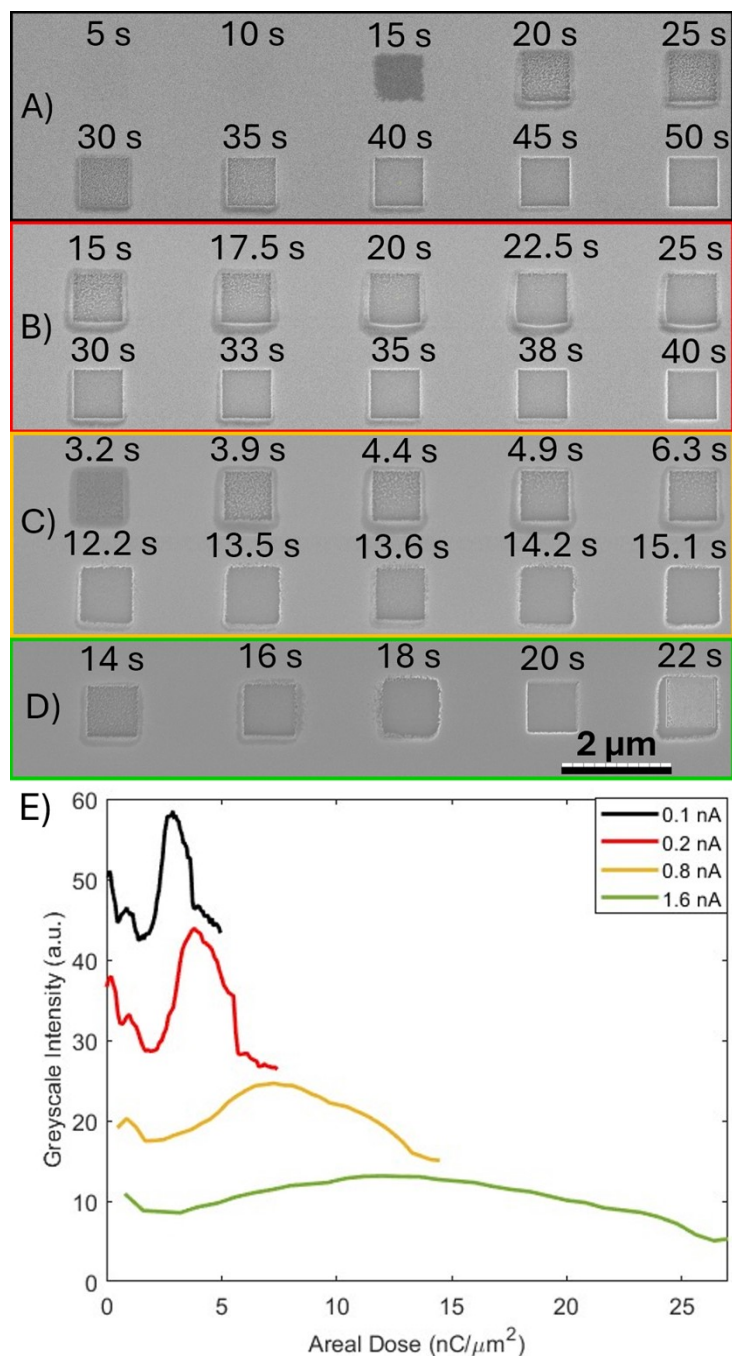

Figure S4. Gas-assisted FEBIE of  $1 \mu\text{m}^2$  box etches were conducted for a beam energy of 20 keV, dwell time of  $0.025 \mu\text{s}$ , pixel pitch of 10 nm,  $\text{XeF}_2$  working pressure of  $4.7 \times 10^{-6}$  Torr, for beam currents of; a) 0.1 nA, b) 0.2 nA, c) 0.8 nA, and d) 1.6 nA. EPM graphs of these etches were all plotted in e).

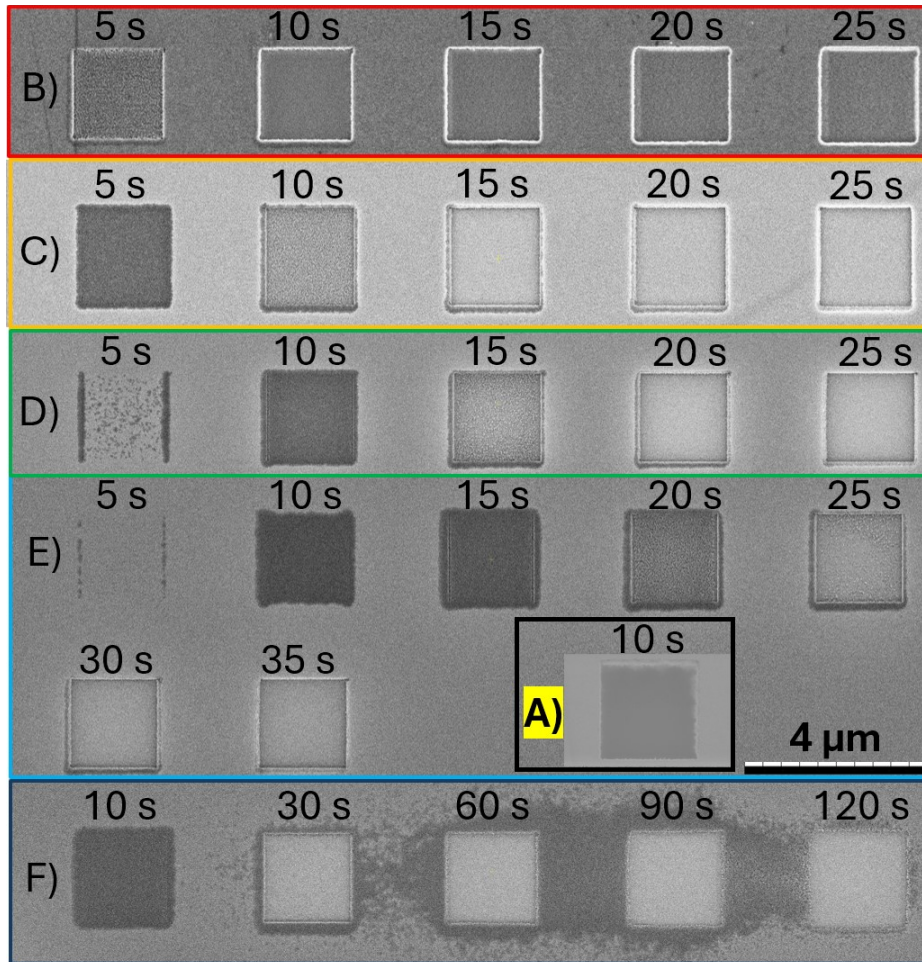

Figure S5. SEM images for of gas-assisted FEBIE of  $4 \mu\text{m}^2$  box etches for a beam current of 0.1 nA, dwell time of  $0.025 \mu\text{s}$ , pixel pitch of 10 nm,  $\text{XeF}_2$  working pressure of  $1 \times 10^{-5}$  Torr, for beam energies of; a) inset of 0.5 keV, b) 1 keV, c) 5 keV, d) 10 keV, e) 15 keV, and f) 10 keV.

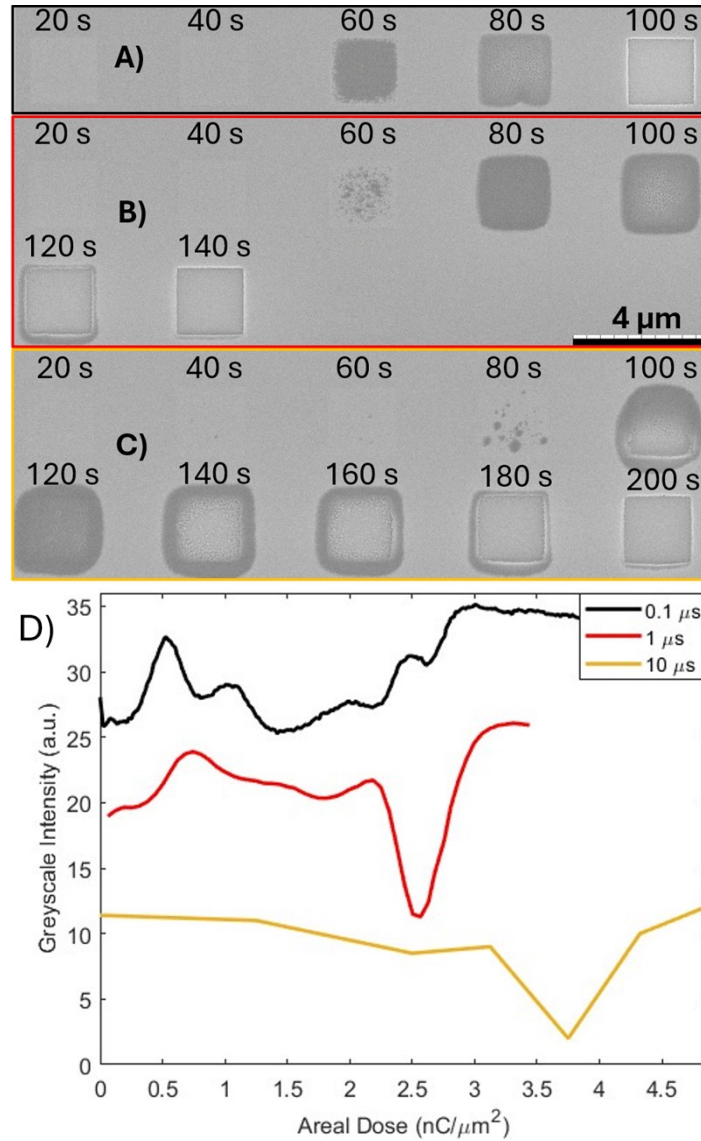

Figure S6. SEM images (left) and end-point-monitor graphs (right) of gas-assisted FEBIE of 4  $\mu\text{m}^2$  boxes at a beam energy of 20 keV, beam current of 0.1 nA, pixel pitch of 10 nm,  $\text{XeF}_2$  working pressure of  $1 \times 10^{-5}$  Torr, at dwell times of a) 0.1  $\mu\text{s}$ , b) 1  $\mu\text{s}$ , and c) 10  $\mu\text{s}$ .

*SI Section 2.  $\text{XeF}_2$  gas-assisted FEBIE line etches of Nb films*

*SI Section 3.  $\text{XeF}_2$  gas-assisted FEBIE statistics*

Table SI.  $\text{XeF}_2$  flux from GIS to eucentric position at various flow rates used for line etching

| $\text{XeF}_2$ working pressure (Torr) | Equilibrium Flux ( $\text{XeF}_2/\text{cm}^2 \text{ s}$ ) | Localized Flux ( $\text{XeF}_2/\text{cm}^2 \text{ s}$ ) |
|----------------------------------------|-----------------------------------------------------------|---------------------------------------------------------|
| 1.15E-05                               | 1.79E+15                                                  | 2.66E+18                                                |
| 8.48E-06                               | 1.32E+15                                                  | 1.96E+18                                                |
| 5.93E-06                               | 9.25E+14                                                  | 1.37E+18                                                |
| 2.67E-06                               | 4.17E+14                                                  | 6.19E+17                                                |

|          |          |          |
|----------|----------|----------|
| 1.04E-06 | 1.62E+14 | 2.41E+17 |
|----------|----------|----------|

Table SII. Summary etch statistics for spontaneous box area study

| Box Area (um <sup>2</sup> ) | Gas flux (XeF <sub>2</sub> /nm <sup>2</sup> -s) | Electron flux (e-/pixel-s) | Electron Areal Dose per pixel area, per dwell (e-/100 nm <sup>2</sup> ) | XeF <sub>2</sub> monolayers per refresh | Ratio e-/XeF <sub>2</sub> | Nb atoms etched/e <sup>+</sup> |
|-----------------------------|-------------------------------------------------|----------------------------|-------------------------------------------------------------------------|-----------------------------------------|---------------------------|--------------------------------|
| 0.25                        | 2.32E+04                                        | 1.25E+09                   | 859.42                                                                  | 0.49                                    | 1.48E+00                  | 0.11                           |
| 1                           | 2.32E+04                                        | 1.25E+09                   | 922.95                                                                  | 1.96                                    | 7.82E-01                  | 0.22                           |
| 4                           | 2.32E+04                                        | 1.25E+09                   | 986.49                                                                  | 7.86                                    | 8.36E-01                  | 0.42                           |
| 16                          | 2.32E+04                                        | 1.25E+09                   | 1050.03                                                                 | 31.43                                   | 8.90E-01                  | 0.59                           |
| 64                          | 2.32E+04                                        | 1.25E+09                   | 1113.56                                                                 | 125.72                                  | 9.44E-01                  | 0.79                           |
